# Supplementary material for: The Transition to the Adult Health Care System Among Youths With Autism Spectrum Disorder
Source: Atypon-hosted journal article supplement (doi:10.1176/appi.ps.201600239), 2017-03-15
Supplement: appi.ps.201600239.ds001.pdf [file appi.ps.201600239.ds001.pdf]

Table 1 [ONLINE SUPPLEMENTAL]. *Sample Characteristics*

| Youth Characteristics            | % (SE)     |
|----------------------------------|------------|
| <b>Age<sup>a</sup></b>           |            |
| 16-18                            | 57.9 (0.2) |
| 19-23                            | 42.1 (0.2) |
| <b>Gender</b>                    |            |
| Male                             | 78.0 (0.3) |
| Female                           | 21.9 (0.3) |
| <b>Race/Ethnicity</b>            |            |
| Non-Hispanic White               | 78.0 (0.3) |
| Black                            | 6.5 (0.2)  |
| Asian                            | 2.2 (0.1)  |
| Hispanic                         | 5.8 (0.2)  |
| Unknown                          | 7.5 (0.2)  |
| <b>Diagnostic Status</b>         |            |
| ASD only                         | 84.9 (0.3) |
| ASD and ID                       | 15.1 (0.3) |
| <b>Household Characteristics</b> |            |
| <b>Region<sup>a</sup></b>        |            |
| Northeast                        | 14.0 (0.2) |
| Midwest                          | 35.1 (0.2) |
| South                            | 36.9 (0.2) |

|                              |            |
|------------------------------|------------|
| West                         | 13.9 (0.2) |
| <b>Household Net Worth</b>   |            |
| <\$25,000                    | 7.4 (0.2)  |
| \$25,000-\$149,999           | 6.6 (0.2)  |
| \$150,000-\$249,999          | 27.8 (0.4) |
| \$250,000-\$499,999          | 10.0 (0.2) |
| \$500,000+                   | 24.6 (0.3) |
| Unknown                      | 23.5 (0.3) |
| <b>Insurance Plan</b>        |            |
| Regular                      | 47.6 (0.2) |
| Administrative Services Only | 52.4 (0.2) |

<sup>a</sup> Reported as a percentage of claims due to information varying within patient.

Note: ASD = autism spectrum disorder; ID = intellectual disability

Table 2 [ONLINE SUPPLEMENTAL]. Average percent of ASD youth with a visit and number of visits per year, by setting<sup>a</sup>

| <u>Age</u> | <u>Outpatient/Office</u> |                 | <u>Inpatient</u>      |                 | <u>Home</u>           |                 | <u>Emergency Department</u> |                 | <u>N</u> |
|------------|--------------------------|-----------------|-----------------------|-----------------|-----------------------|-----------------|-----------------------------|-----------------|----------|
|            | <u>% with a visit</u>    | <u># visits</u> | <u>% with a visit</u> | <u># visits</u> | <u>% with a visit</u> | <u># visits</u> | <u>% with a visit</u>       | <u># visits</u> |          |
| --         |                          |                 |                       |                 |                       |                 |                             |                 | --       |
| 16         | 98.94%                   | 12.14           | 10.32%                | 0.90            | 6.63%                 | 0.85            | 10.78%                      | 0.53            | 10,613   |
| 17         | 98.87%                   | 11.63           | 10.41%                | 0.88            | 6.40%                 | 0.83            | 10.80%                      | 0.49            | 9,355    |
| 18         | 98.68%                   | 11.52           | 10.27%                | 0.90            | 6.45%                 | 0.98            | 10.73%                      | 0.53            | 7,817    |
| 19         | 98.45%                   | 10.74           | 9.26%                 | 0.77            | 6.39%                 | 0.85            | 10.81%                      | 0.55            | 6,243    |
| 20         | 98.31%                   | 10.26           | 8.88%                 | 0.68            | 7.02%                 | 0.87            | 11.10%                      | 0.51            | 4,845    |
| 21         | 98.02%                   | 10.19           | 8.72%                 | 0.70            | 6.55%                 | 0.95            | 10.75%                      | 0.56            | 3,785    |
| 22         | 97.67%                   | 10.09           | 9.41%                 | 0.78            | 7.05%                 | 0.95            | 10.55%                      | 0.53            | 3,006    |
| 23         | 98.04%                   | 10.75           | 9.09%                 | 0.66            | 7.00%                 | 0.92            | 9.13%                       | 0.41            | 2,343    |
| Total      | 98.56%                   | 11.22           | 9.80%                 | 0.82            | 6.60%                 | 0.89            | 10.72%                      | 0.52            | 48,007   |

<sup>a</sup> Results presented are descriptive findings. These numbers do not reflect adjustments made in the multivariate model.
