# Supplementary material for: The Transition to the Adult Health Care System Among Youths With Autism Spectrum Disorder
Source: Atypon-hosted journal article supplement (doi:10.1176/appi.ps.201600239), 2017-03-15
Supplement: appi.ps.201600239.ds001.pdf [file appi.ps.201600239.ds001.pdf]

 


Psychiatry Online
